# Supplementary material for: Rapid detection of Enterococcus and vancomycin resistance using recombinase polymerase amplification
Source: PeerJ. 2021 Dec 7;9:e12561. doi: 10.7717/peerj.12561 (PMC8663621; doi:10.7717/peerj.12561)
Supplement: Supplemental Information 5 [file peerj-09-12561-s005.xlsx]

## Sheet: Results
#	Identification	PCR	PCR	PCR	หมายเหตุ	RPA-LF	RPA-LF	RPA-LF	RPA-LF	RPA-LF		p=positive		PC=positive control
		AGE	AGE	AGE		Blood	Blood	Blood	Stool	Stool		n=negative		NC=negative control
		ddl (fcm)	vanA	vanB		ddl (fcm)	vanA	vanB	ddl (fcm)	vanA		ND-Not done
VRE164 (PC)	VRE164 E. faecium vanA	p	p	n		p	p	n	p	p
VRE165	VRE165 E. faecium vanA	p	p	n		p	p	n	p	p
VRE166	VRE166 E. faecium vanA	p	p	n		p	p	n	p	p
VRE167	VRE167 E. faecium vanA	p	p	n		p	p	n	p	p
VRE168	VRE168 E. faecium vanA	p	p	n		p	p	n	p	p
VRE169	VRE169 E. faecium vanA	p	p	n		p	p	n	p	p
VRE170	VRE170 E. faecium vanA	p	p	n		p	p	n	p	p
VRE171	VRE171 E. faecium vanA	p	p	n		p	p	n	p	p
VRE172	VRE172 E. faecium vanA	p	p	n		p	p	n	p	p
VRE173	VRE173 E. faecium vanA	p	p	n		p	p	n	p	p
VRE176	VRE176 E. faecium vanA	p	p	n		p	p	n	p	p
VRE177	VRE177 E. faecium vanA	p	p	n		p	p	n	p	p
VRE178	VRE178 E. faecium vanA	p	p	n		p	p	n	p	p
VRE180	VRE180 E. faecium vanA	p	p	n		p	p	n	p	p
VAE02	vanA E. faecium	p	p	n	vanA	p	p	n	p	p
VAE04	vanA E. faecium	p	p	n	vanA	p	p	n	p	p
VAE06	vanA E. faecium	p	p	n	vanA	p	p	n	p	p
VAE07	vanA E. faecium	p	p	n	vanA	p	p	n	p	p
VAE11	vanA E. faecium	p	p	n	vanA	p	p	n	p	p
VAE12	vanA E. faecium	p	p	n	vanA	p	p	n	p	p
VAE13	vanA E. faecium	p	p	n	vanA	p	p	n	p	p
VAE15	vanA E. faecium	p	p	n	vanA	p	p	n	p	p
VAE20	vanA E. faecium	p	p	n	vanA	p	p	n	p	p
VAE24	vanA E. faecium	p	p	n	vanA	p	p	n	p	p
VAE28	vanA E. faecium	p	p	n	vanA	p	p	n	p	p
VAE29	vanA E. faecium	p	p	n	vanA	p	p	n	p	p
VAE32	vanA E. faecium	p	p	n	vanA	p	p	n	p	p
VAE35	vanA E. faecium	p	p	n	vanA	p	p	n	p	p
VAE38	vanA E. faecium	p	p	n	vanA	p	p	n	p	p
VAE41	vanA E. faecium	p	p	n	vanA	p	p	n	p	p
VAE42	vanA E. faecium	p	p	n	vanA	p	p	n	p	p
VAE49	vanA E. faecium	p	p	n	vanA	p	p	n	p	p
VAE57	vanA E. faecium	p	p	n	vanA	p	p	n	p	p
VAE87	vanA E. faecium	p	p	n	vanA	p	p	n	p	p
fcm-10	vanA E. faecium	p	p	n	VRE210	p	p	n	p	p
VRE79 (PC)	vanB E. faecalis	n	n	p	กรมวิทย์ 7967	n	n	p	n	n
VRE47	vanB E. faecium	p	n	p	กรมวิทย์ 47075	p	n	p	p	n
VCE01	vanC1 E. gallinarum	n	n	n	vanC1	n	n	n	n	n
VCE02	vanC2 E. casseliflavus	n	n	n		n	n	n	n	n
VSE179	179 E. faecium	p	n	n	E-test (van) = VSE	p	n	n	p	n
fcm-1	E. faecium	p	n	n	VSE201	p	n	n	p	n
fcm-2	E. faecium	p	n	n	VSE202	p	n	n	p	n
fcm-3	E. faecium	p	n	n	VSE203	p	n	n	p	n
fcm-4	E. faecium	p	n	n	VSE204	p	n	n	p	n
fcm-5	E. faecium	p	n	n	VSE205	p	n	n	p	n
fcm-6	E. faecium	p	n	n	VSE206	p	n	ND	p	n
fcm-7	E. faecium	p	n	n	VSE207	p	n	ND	p	n
fcm-8	E. faecium	p	n	n	VSE208	p	n	ND	p	n
fcm-9	E. faecium	p	n	n	VSE209	p	n	ND	p	n
fcm-11	E. faecium	p	n	n	VSE211	p	n	ND	p	n
fcm-12	E. faecium	p	n	n	VSE212	p	n	ND	p	n
fcm-13	E. faecium	p	n	n	VSE213	p	n	ND	p	n
fcm15	E. faecium	p	n	n	VSE215	p	n	ND	p	n
fcm16	E. faecium	p	n	n	VSE216	p	n	ND	p	n
fcm17	E. faecium	p	n	n	VSE217	p	n	ND	p	n
fcm18	E. faecium	p	n	n	VSE218	p	n	ND	p	n
fcm20	E. faecium	p	n	n	VSE220	p	n	ND	p	n
fcm21	E. faecium	p	n	n	VSE221	p	n	ND	p	n
fcm22	E. faecium	p	n	n	VSE222	p	n	ND	p	n
VSE05	E. faecalis	n	n	n		n	n	n	n	n
VSE07	E. faecalis	n	n	n		n	n	n	n	n
VSE08	E. faecalis	n	n	n		n	n	ND	n	n
VSE09	E. faecalis	n	n	n		n	n	ND	n	n
VSE10	E. faecalis	n	n	n		n	n	ND	n	n
VSE11	E. faecalis	n	n	n		n	n	ND	n	n
VSE13	E. faecalis	n	n	n		n	n	ND	n	n
VSE14	E. faecalis	n	n	n		n	n	ND	n	n
VSE18	E. faecalis	n	n	n		n	n	ND	n	n
VSE19	E. faecalis	n	n	n		n	n	ND	n	n
VSE21	E. faecalis	n	n	n		n	n	ND	n	n
VSE23	E. faecalis	n	n	n		n	n	ND	n	n
VSE25	E. faecalis	n	n	n		n	n	ND	n	n
VSE27	E. faecalis	n	n	n		n	n	ND	n	n
VSE29	E. faecalis	n	n	n		n	n	ND	n	n
VSE32	E. faecalis	n	n	n		n	n	ND	n	n
VSE35	E. faecalis	n	n	n		n	n	ND	n	n
VSE36	E. faecalis	n	n	n		n	n	ND	n	n
VSE37	E. faecalis	n	n	n		n	n	ND	n	n
VSE39	E. faecalis	n	n	n		n	n	ND	n	n
fcl-1	E. faecalis	n	n	n	VSE101	n	n	n	n	n
fcl-2	E. faecalis	n	n	n	VSE102	n	n	n	n	n
fcl-3	E. faecalis	n	n	n	VSE103	n	n	n	n	n
fcl-4	E. faecalis	n	n	n	VSE104	n	n	ND	n	n
fcl-5	E. faecalis	n	n	n	VSE105	n	n	ND	n	n
fcl-6	E. faecalis	n	n	n	VSE106	n	n	ND	n	n
fcl-7	E. faecalis	n	n	n	VSE107	n	n	ND	n	n
fcl-8	E. faecalis	n	n	n	VSE108	n	n	ND	n	n
fcl-10	E. faecalis	n	n	n	VSE110	n	n	ND	n	n
fcl-12	E. faecalis	n	n	n	VSE112	n	n	ND	n	n
fcl-13	E. faecalis	n	n	n	VSE113	n	n	ND	n	n
fcl-14	E. faecalis	n	n	n	VSE114	n	n	ND	n	n
fcl-15	E. faecalis	n	n	n	VSE115	n	n	ND	n	n
fcl-16	E. faecalis	n	n	n	VSE116	n	n	ND	n	n
fcl-17	E. faecalis	n	n	n	VSE117	n	n	ND	n	n
fcl-18	E. faecalis	n	n	n	VSE118	n	n	ND	n	n
fcl-20	E. faecalis	n	n	n	VSE120	n	n	ND	n	n
fcl-21	E. faecalis	n	n	n	VSE121	n	n	ND	n	n
fcl-22	E. faecalis	n	n	n	VSE122	n	n	ND	n	n
fcl-23	E. faecalis	n	n	n	VSE123	n	n	ND	n	n
fcl-24	E. faecalis	n	n	n	VSE124	n	n	ND	n	n
fcl-25	E. faecalis	n	n	n	VSE125	n	n	ND	n	n
fcl-26	E. faecalis	n	n	n	VSE126	n	n	ND	n	n
fcl-27	E. faecalis	n	n	n	VSE127	n	n	ND	n	n
fcl-28	E. faecalis	n	n	n	VSE128	n	n	ND	n	n
fcl-29	E. faecalis	n	n	n	VSE129	n	n	ND	n	n
fcl-30	E. faecalis	n	n	n	VSE130	n	n	ND	n	n
fcl-31	E. faecalis	n	n	n	VSE131	n	n	ND	n	n
Espp3	E. raffinosus	n	n	n		n	n	n	n	n
Espp4	E. gallinarum	n	n	n		n	n	n	n	n
Espp5	E. avium	n	n	n		n	n	n	n	n
NE1	S. pyogenes (Gr.A)	n	n	n		n	n	n	n	n
NE2	S. pyogenes (Gr.A)	n	n	n		n	n	ND	n	n
NE3	S. agalactiae (Gr.B)	n	n	n		n	n	ND	n	n
NE4	St. pyogenes (Gr.A)	n	n	n		n	n	ND	n	n
NE5	S. agalactiae (Gr.B)	n	n	n		n	n	ND	n	n
NE6	S. agalactiae (Gr.B)	n	n	n		n	n	ND	n	n
NE8	S. agalactiae (Gr.B)	n	n	n		n	n	ND	n	n
NE10	S. agalactiae (Gr.B)	n	n	n		n	n	ND	n	n
NE11	S. dysgalactiae	n	n	n		n	n	ND	n	n
NE12	S. constellatus	n	n	n		n	n	ND	n	n
NE13 (NC)	S. aureus	n	n	n		n	n	n	n	n
NE14	S. heamolyticus	n	n	n		n	n	ND	n	n
R2	E. coli	n	n	n		n	n	n	n	n
R12	K. pneumoniae	n	n	n		n	n	n	n	n
R14	A. baumannii	n	n	n		n	n	n	n	n
R15	P. aeruginosa	n	n	n		n	n	n	n	n
blood culture samples
E1	E. faecalis	n	n	n		n	n	n	ND	ND
E2	E. faecium	p	n	n		p	n	n	ND	ND
E3	E. casseliflavus	n	n	n		n	n	n	ND	ND
E4	E. faecalis	n	n	n		n	n	n	ND	ND
E6	E. faecium	p	n	n		p	n	n	ND	ND
E7	E. faecalis	n	n	n		n	n	n	ND	ND
E8	E. faecium	p	n	n		p	n	n	ND	ND
E9	E. faecalis	n	n	n		n	n	n	ND	ND
E10	E. faecalis	n	n	n		n	n	n	ND	ND
E11	E. faecium	p	n	n		p	n	n	ND	ND
S3	S. aureus	n	n	n		n	n	n	ND	ND
S13	S. epidermidis	n	n	n		n	n	n	ND	ND
S42	Staph (neg)	n	n	n		n	n	n	ND	ND
St1	St. viridans	n	n	n		n	n	n	ND	ND
St2	S. gallolyticus	n	n	n		n	n	n	ND	ND
rectal swab
VSE752	E. faecium	p	n	ND		ND	ND	ND	p	n
VSE754	E. faecium	p	n	ND		ND	ND	ND	p	n
VRE779	vanA E. faecium	p	p	ND		ND	ND	ND	p	p
VSE7105	E. faecium	p	n	ND		ND	ND	ND	p	n
VSE7116	E. faecium	p	n	ND		ND	ND	ND	p	n
VSE7123	E. faecium	p	n	ND		ND	ND	ND	p	n
VSE7138	group D streptococci non-enterococcus	n	n	ND	BE-black, 6.5%NaCl-NG	ND	ND	ND	n	n
VSE7140	group D streptococci non-enterococcus	n	n	ND	BE-black, 6.5%NaCl-NG	ND	ND	ND	n	n
VSE7144	E. faecium	p	n	ND		ND	ND	ND	p	n
VSE7154	E. faecalis	n	n	ND	iden by PCR for ddl fcl	ND	ND	ND	n	n
